# Supplementary material for: Resident microbes of lactation rooms and daycares
Source: PubMed Central journal article supplement (PMC6913265; doi:10.7717/peerj.8168), 2019-12-13

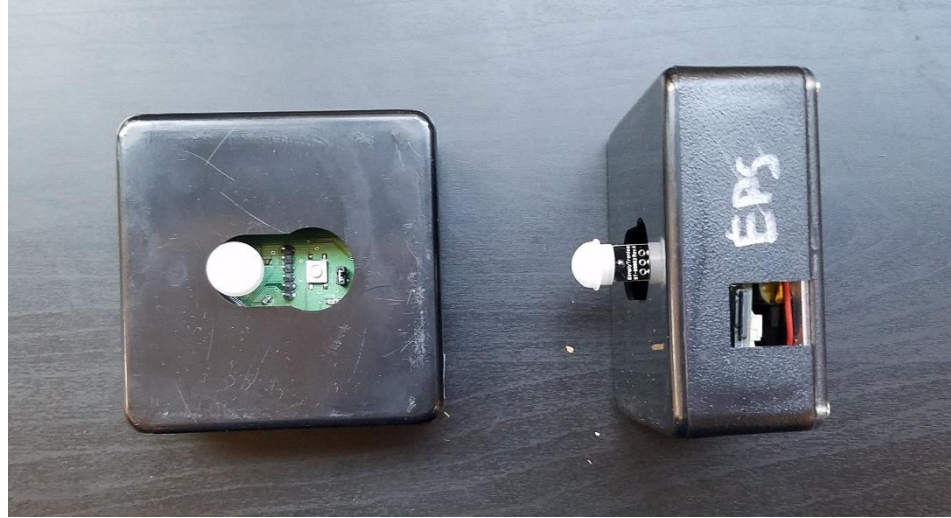

Supplement: peerj-07-8168-s001.pdf [file peerj-07-8168-s001.pdf]
