# Supplementary material for: Resident microbes of lactation rooms and daycares
Source: PubMed Central journal article supplement (PMC6913265; doi:10.7717/peerj.8168), 2019-12-13

## Rarefaction Curve

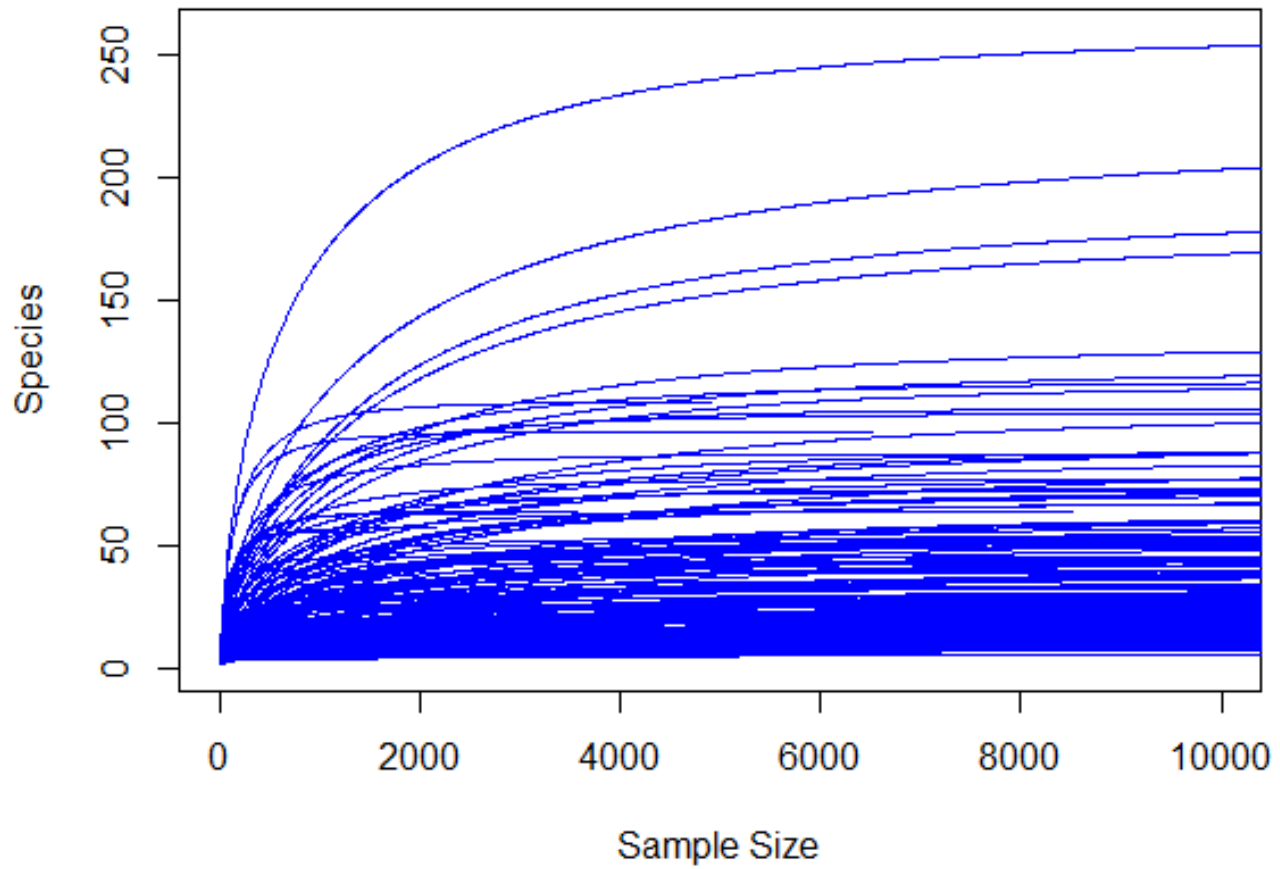

Supplement: peerj-07-8168-s002.pdf [file peerj-07-8168-s002.pdf]
