# Supplementary material for: Resident microbes of lactation rooms and daycares
Source: PubMed Central journal article supplement (PMC6913265; doi:10.7717/peerj.8168), 2019-12-13

**A****Weighted UniFrac Winter 2016 NMDS**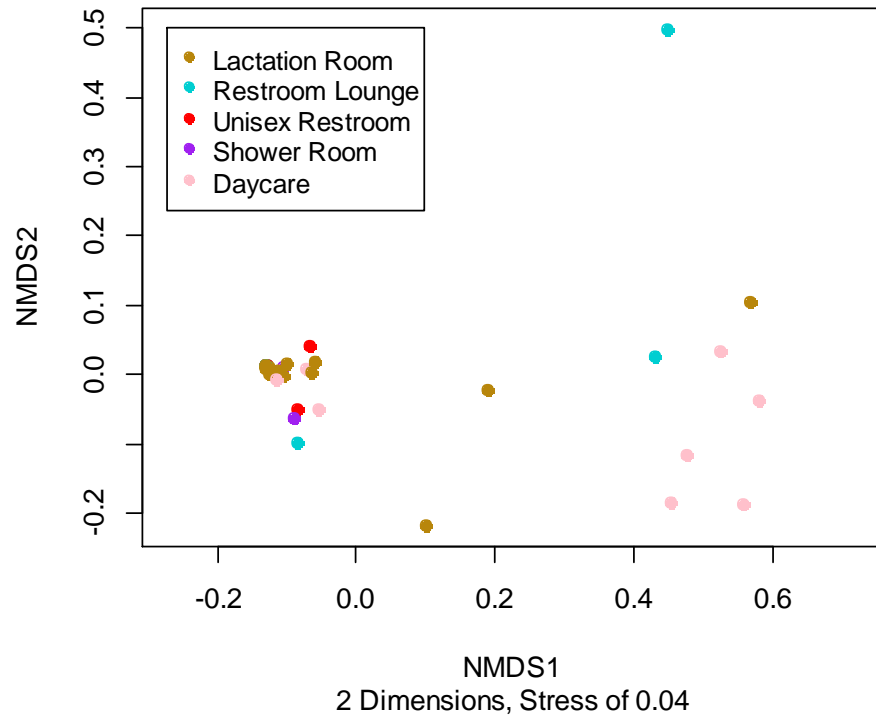**B****Weighted UniFrac Winter 2016 NMDS**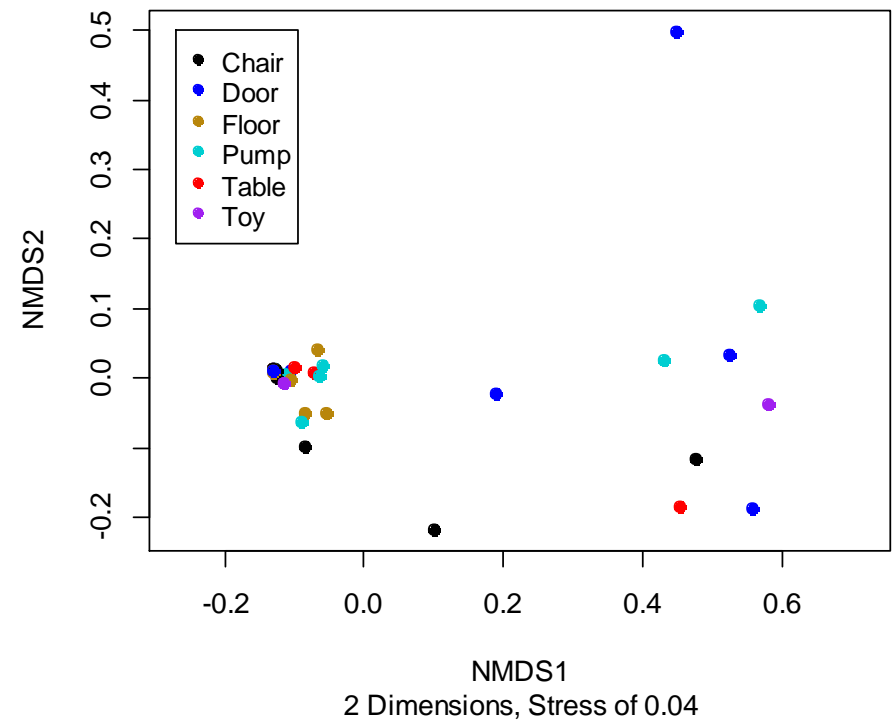

Supplement: peerj-07-8168-s010.pdf [file peerj-07-8168-s010.pdf]
