# Supplementary material for: Resident microbes of lactation rooms and daycares
Source: PeerJ journal article supplement (doi:10.7717/peerj.8168), 2019-12-13

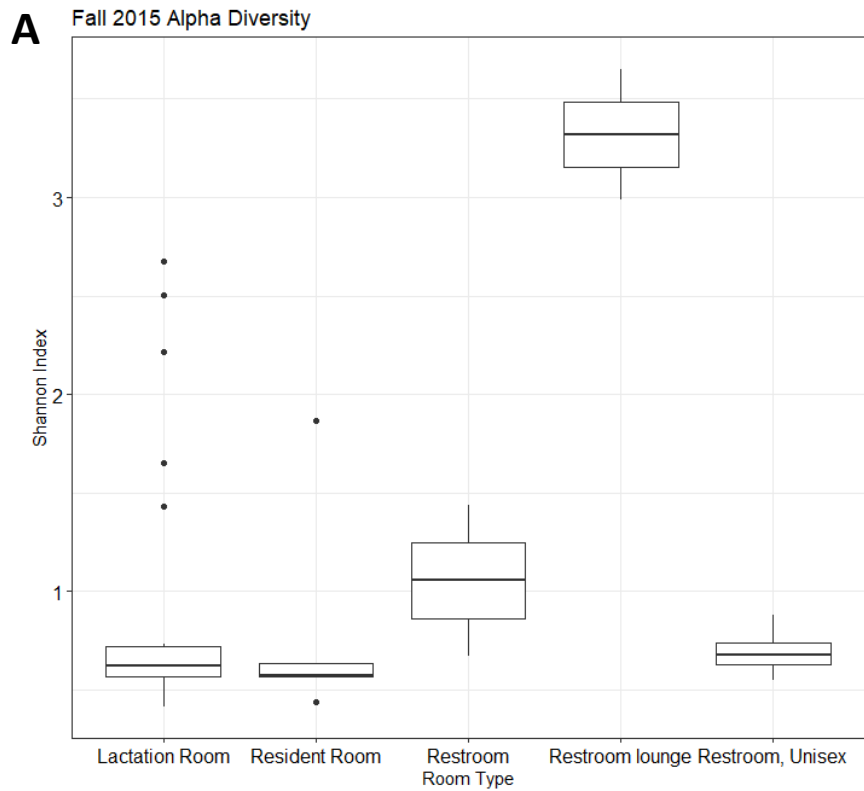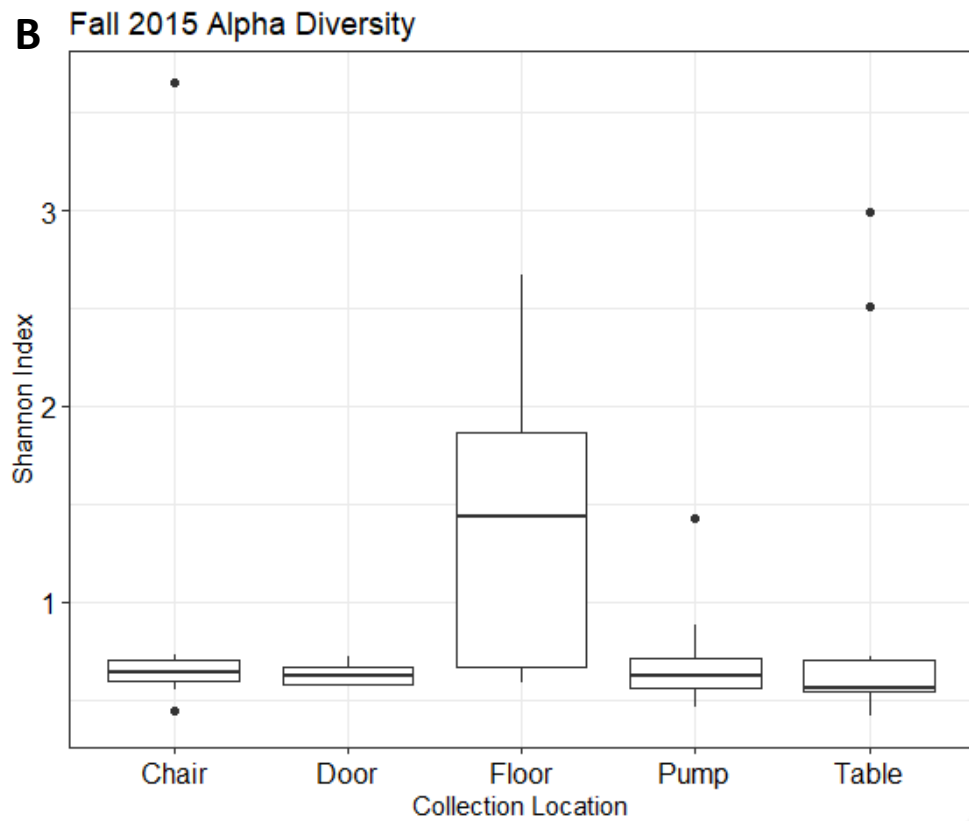

Supplement: Supplemental_Figure_4.pdf [file Supplemental_Figure_4.pdf]
