# Supplementary material for: Resident microbes of lactation rooms and daycares
Source: PeerJ journal article supplement (doi:10.7717/peerj.8168), 2019-12-13

### A Weighted UniFrac Fall 2015 NMDS

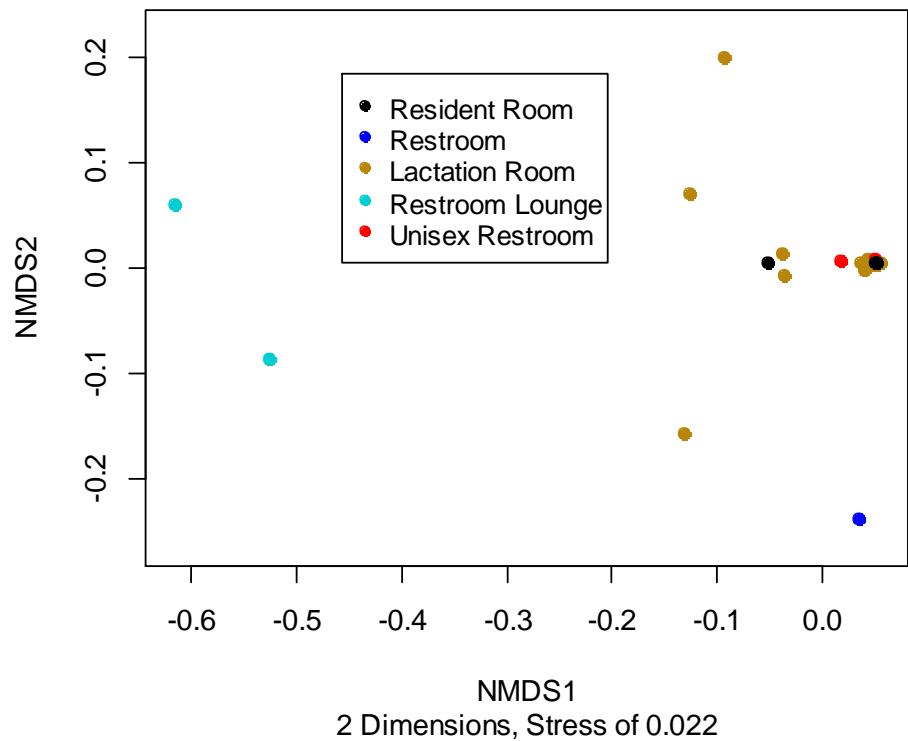

### B

### Weighted UniFrac Fall 2015 NMDS

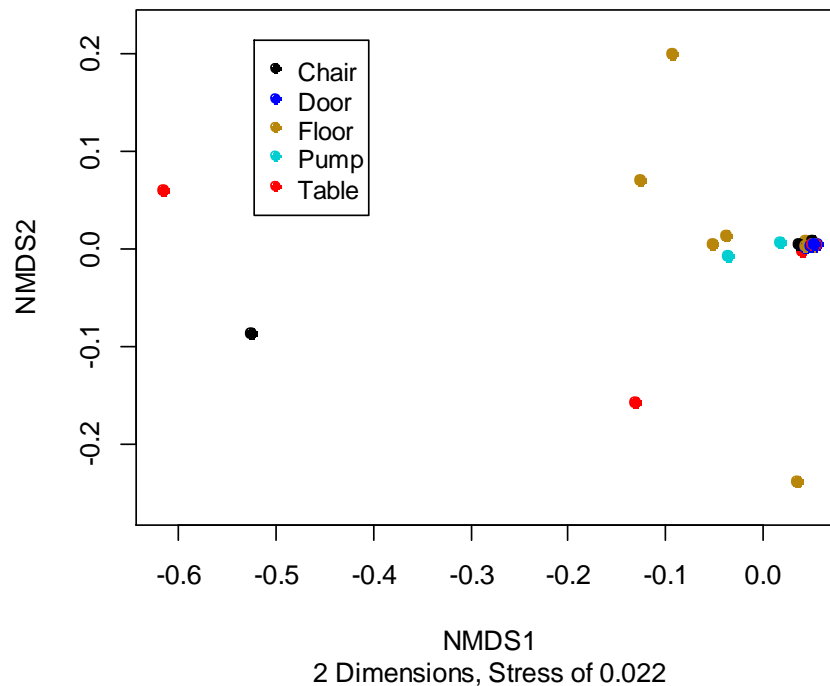

Supplement: Supplemental_Figure_6.pdf [file Supplemental_Figure_6.pdf]
