# Supplementary material for: Resident microbes of lactation rooms and daycares
Source: PeerJ journal article supplement (doi:10.7717/peerj.8168), 2019-12-13

Fall 2016 Relative Abundance of Families by Room and Sample Location

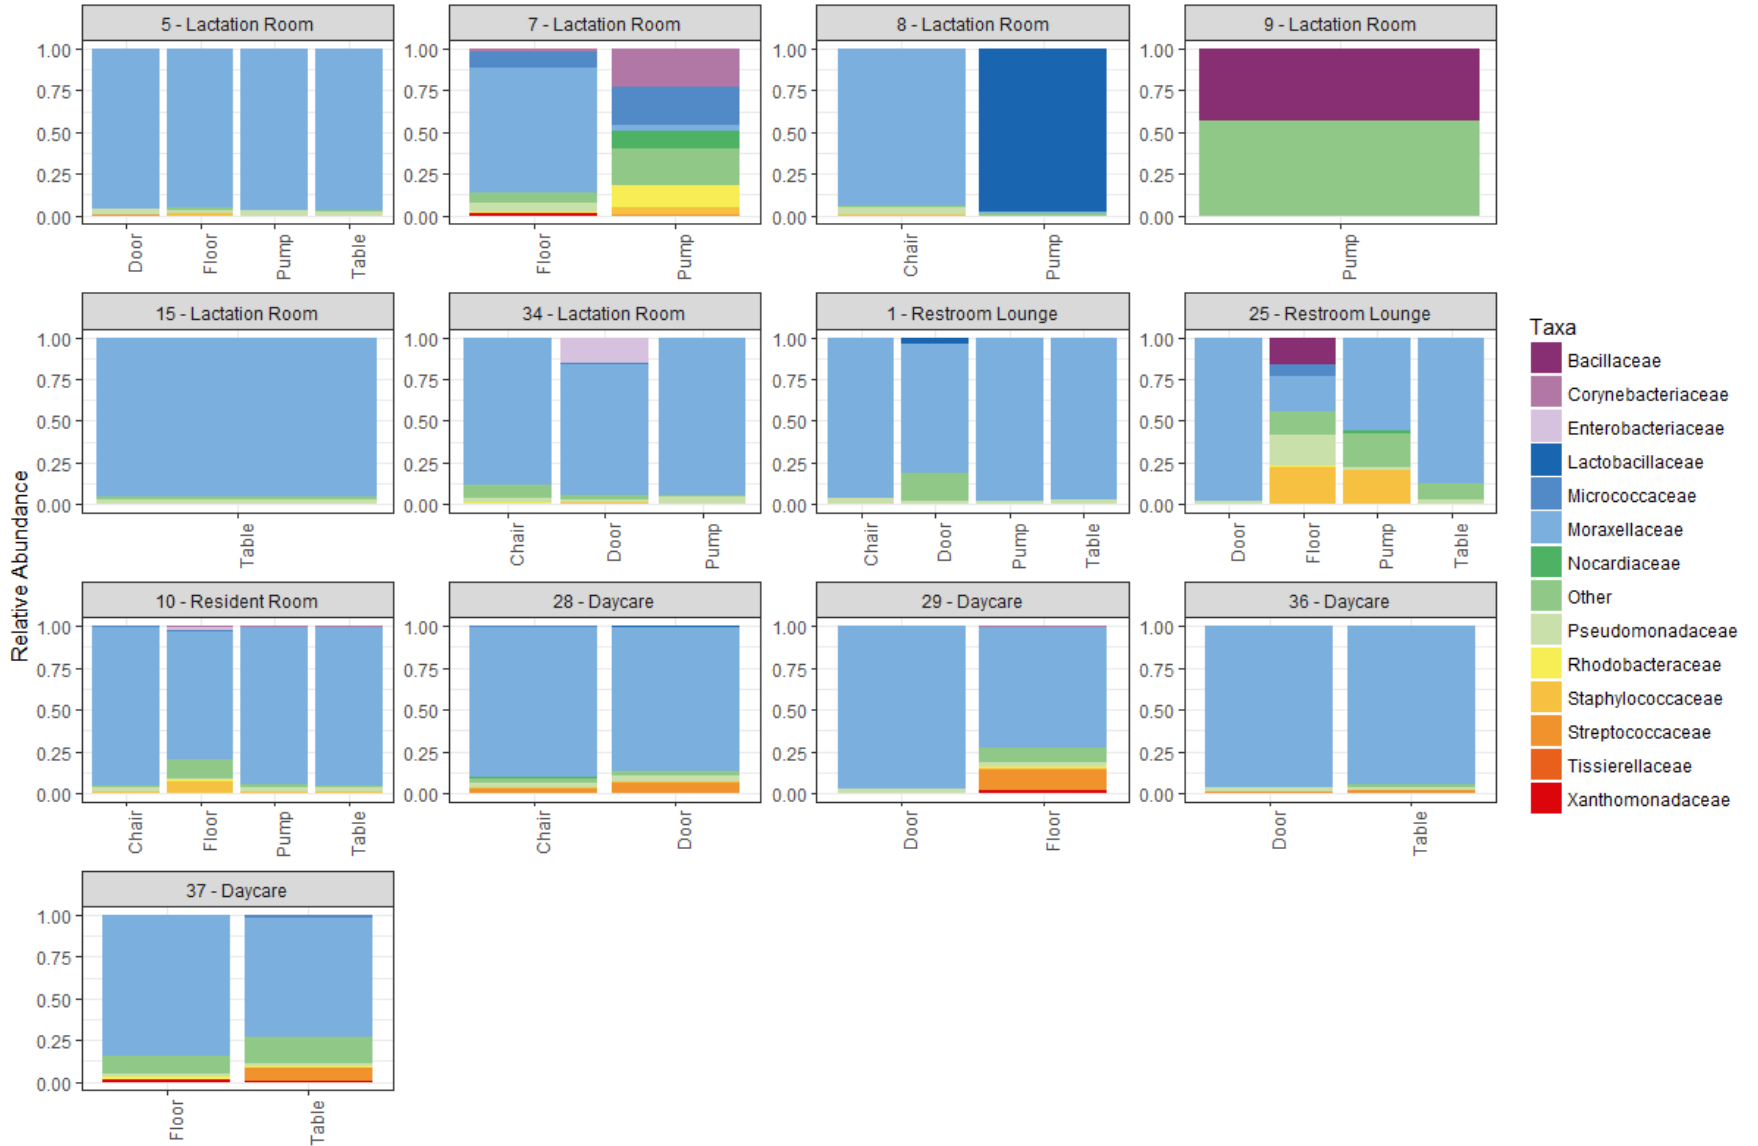

Supplement: Supplemental_Figure_12.pdf [file Supplemental_Figure_12.pdf]
