# Supplementary material for: Resident microbes of lactation rooms and daycares
Source: PeerJ journal article supplement (doi:10.7717/peerj.8168), 2019-12-13

**A** Fall 2016 Alpha Diversity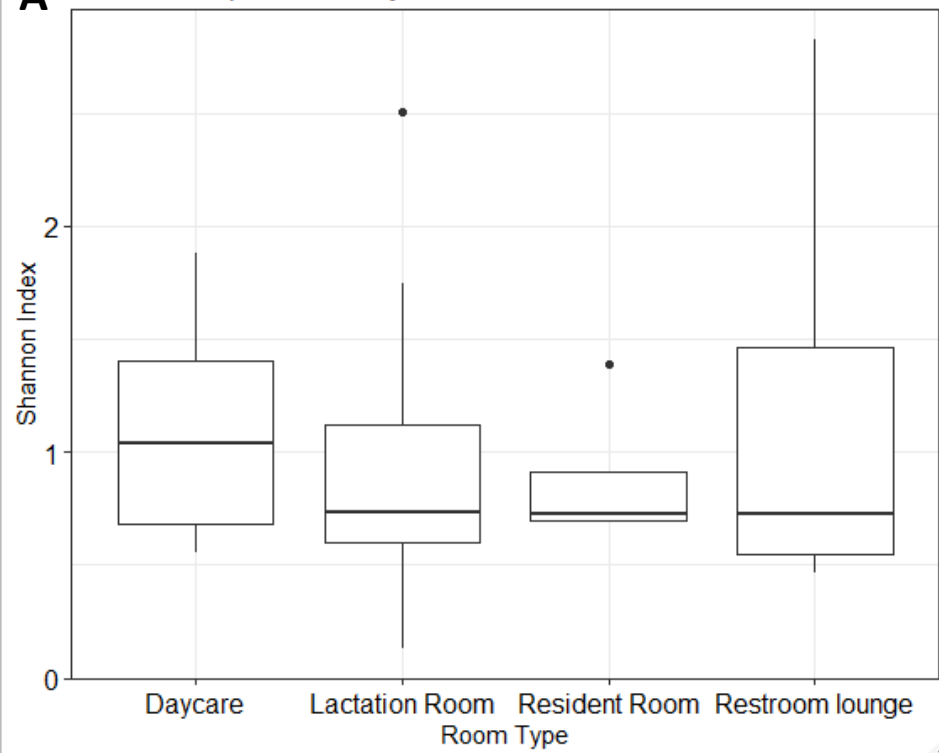**B** Fall 2016 Alpha Diversity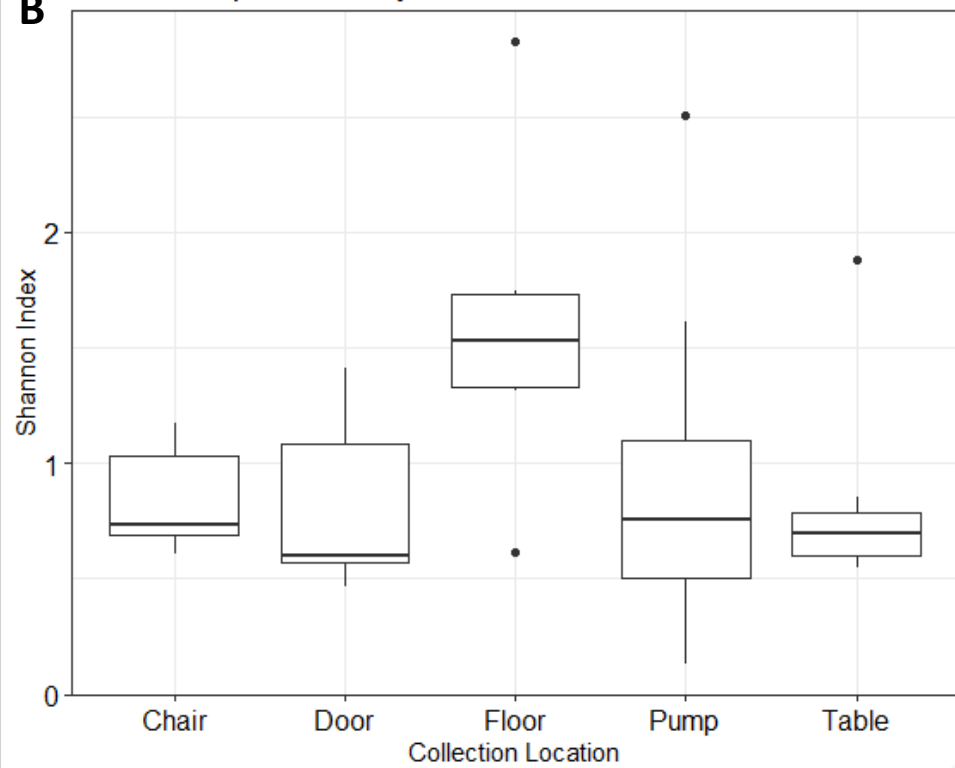

Supplement: Supplemental_Figure_13.pdf [file Supplemental_Figure_13.pdf]
