# Supplementary material for: Resident microbes of lactation rooms and daycares
Source: PeerJ journal article supplement (doi:10.7717/peerj.8168), 2019-12-13

**A** Unweighted UniFrac Fall 2016 NMDS

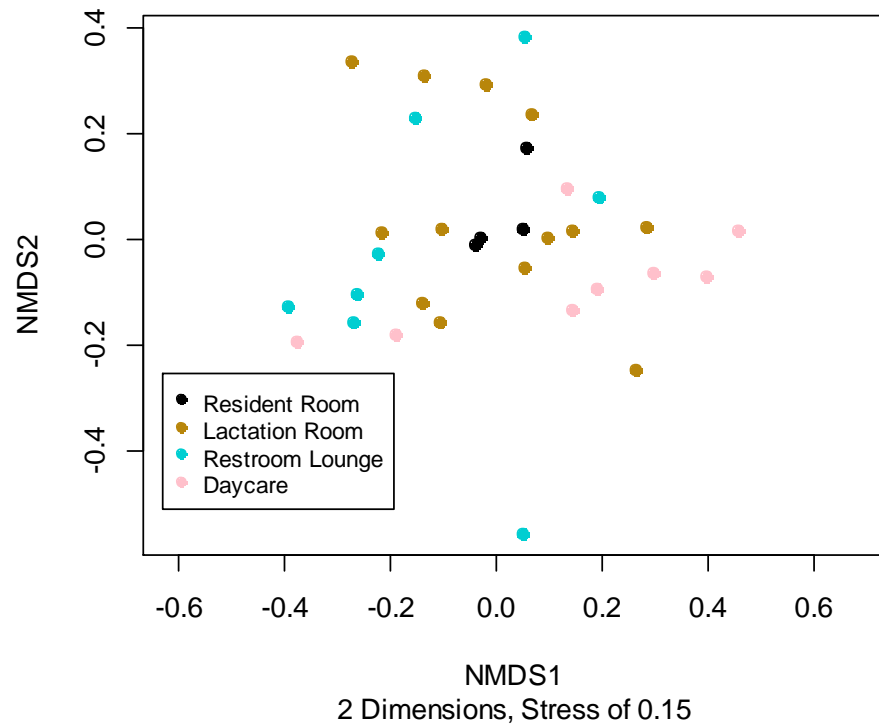

**B** Unweighted UniFrac Fall 2016 NMDS

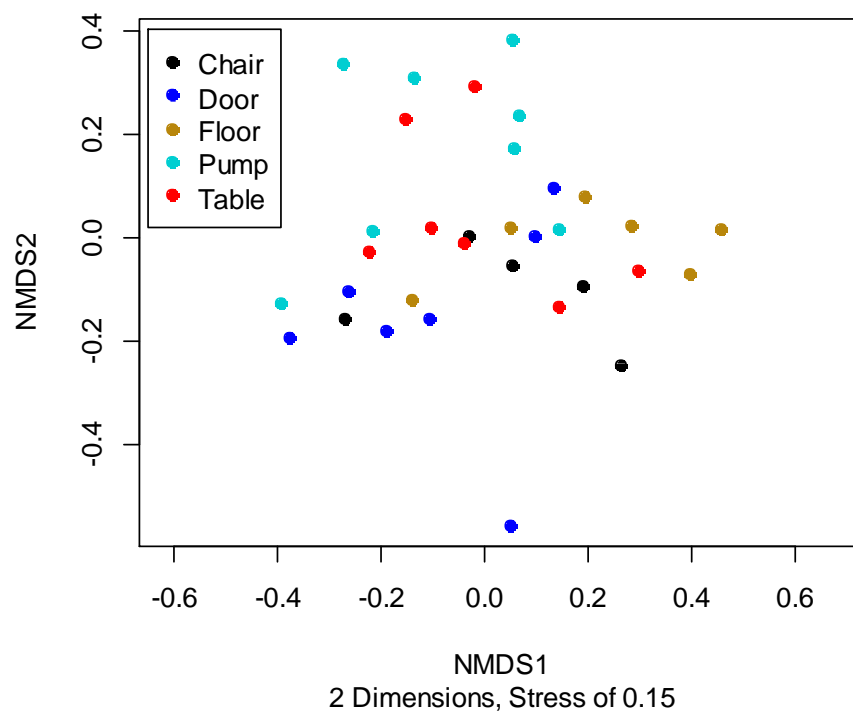

Supplement: Supplemental_Figure_14.pdf [file Supplemental_Figure_14.pdf]
