# Supplementary material for: Resident microbes of lactation rooms and daycares
Source: PeerJ journal article supplement (doi:10.7717/peerj.8168), 2019-12-13

**A****Weighted UniFrac Fall 2016 NMDS**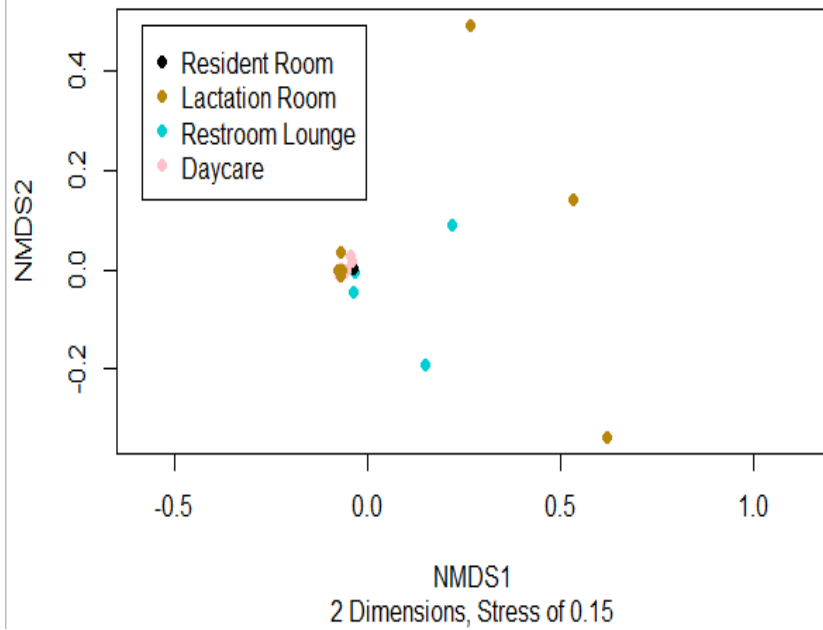**B****Weighted UniFrac Fall 2016 NMDS**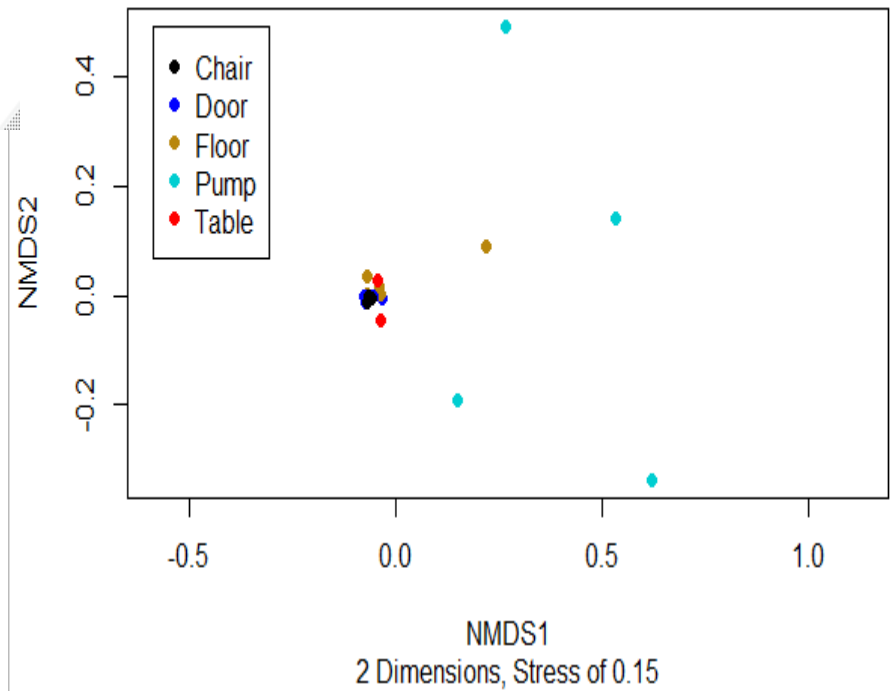

Supplement: Supplemental_Figure_15.pdf [file Supplemental_Figure_15.pdf]
